a supplemental alarm for critically low systolic blood pressure. *Anesth Analg* 2015; 121:1500–7

18. Kheterpal S, Shanks A, Tremper KK: Impact of a novel multiparameter decision support system on

intraoperative processes of care and postoperative outcomes. *ANESTHESIOLOGY* 2018; 128:272–82

19. Sessler DI: Decision support alerts: Importance of validation. *ANESTHESIOLOGY* 2018; 128:241–3

## ANESTHESIOLOGY REFLECTIONS FROM THE WOOD LIBRARY-MUSEUM

### Laughing “Gas Administered”: A Deathbed Blotter from Bucharest’s Horace David

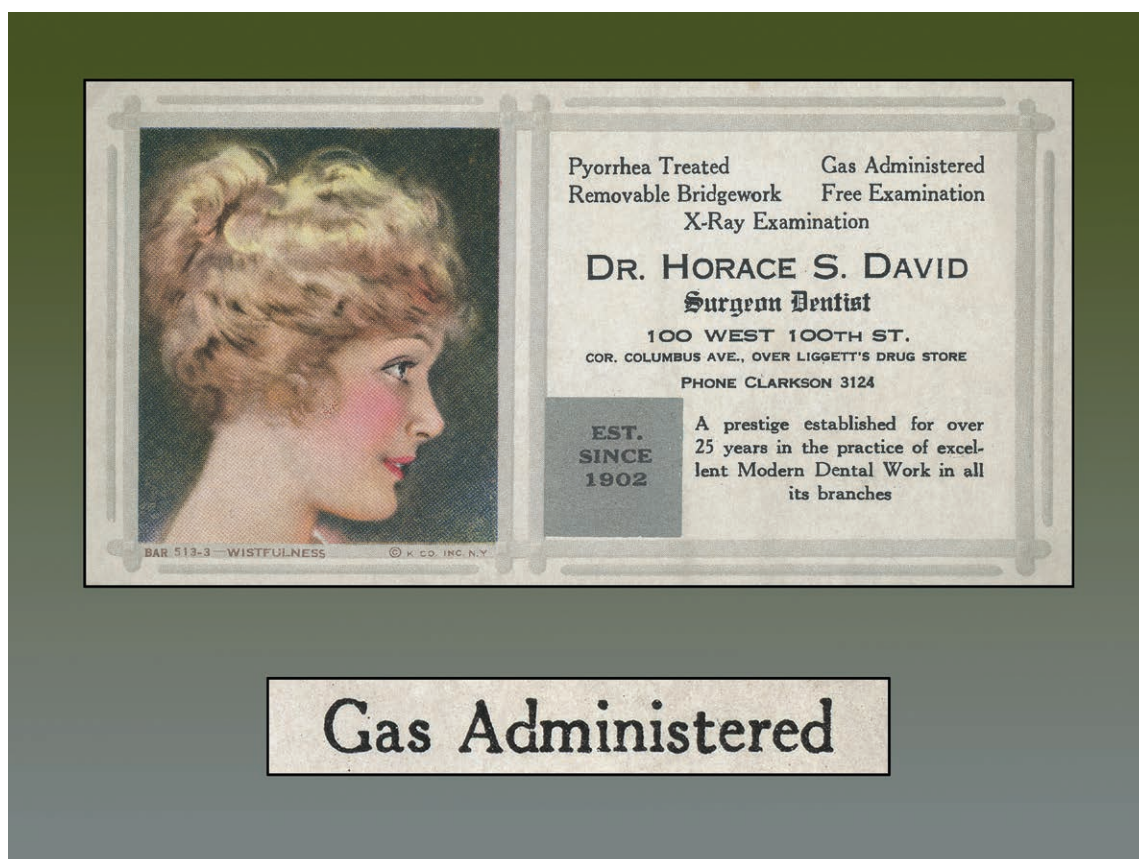

Two years after Bucharest became a capital city, a nearly 4-yr-old Horace S. David arrived in 1883 at the Port of New York as a Romanian immigrant. A decade later, after moving from state to state, his family settled finally in New York. Three years after earning his D.D.S. from New York Dental School, Dr. David was naturalized in 1905 as a U.S. citizen. From the Wood Library-Museum’s Ben Z. Swanson Collection, the ink blotter (*above*) advertised his services, including “Gas Administered.” Sadly, the blotter was issued by his Manhattan office just shortly before Dr. David passed away at 50 yr of age. (Copyright © the American Society of Anesthesiologists’ Wood Library-Museum of Anesthesiology.)

*George S. Bause, M.D., M.P.H., Honorary Curator and Laureate of the History of Anesthesia, Wood Library-Museum of Anesthesiology, Schaumburg, Illinois, and Clinical Associate Professor, Case Western Reserve University, Cleveland, Ohio. UJYC@aol.com.*
